# Supplementary material for: Sensitivity and Predictive Value of 15 PubMed Search Strategies to Answer Clinical Questions Rated Against Full Systematic Reviews
Source: PubMed Central journal article supplement (PMC3414859; doi:10.2196/jmir.2021), 2012-06-12
Supplement: jmir_v14i3e85_app1.pdf [file jmir_v14i3e85_app1.pdf]

**Multimedia Appendix 1. Detailed description of the 30 Cochrane Systematic Reviews on therapeutic interventions, used to identify relevant studies on 30 clinical questions.**

|          | <b>PMID</b> | <b>Author</b> | <b>title</b>                                                                                                   | <b>Cochrane Group</b>                 | <b>Issue (2010)</b> | <b>Review status (as of February 2010)</b> | <b>Year(Month) content uptodate</b> | <b>N studies included in review</b> | <b>N (%) retrievable in Pubmed</b> |
|----------|-------------|---------------|----------------------------------------------------------------------------------------------------------------|---------------------------------------|---------------------|--------------------------------------------|-------------------------------------|-------------------------------------|------------------------------------|
| <b>1</b> | 12076427    | Tudur         | Carbamazepine versus phenytoin monotherapy for epilepsy                                                        | Epilepsy                              | 2                   | New search: no change                      | 2010 (1)                            | 10                                  | 8 (80)                             |
| <b>2</b> | 20166082    | Yang          | Chest physiotherapy for pneumonia in adults                                                                    | Acute Respiratory Infections          | 2                   | New review                                 | 2009 (8)                            | 6                                   | 5 (83)                             |
| <b>3</b> | 17443601    | Vergara       | Epinephrine injection versus epinephrine injection and a second endoscopic method in high risk bleeding ulcers | Upper Gastrointestinal and Pancreatic | 2                   | New search: no change                      | 2009 (12)                           | 18                                  | 15 (83)                            |
| <b>4</b> | 20166076    | Fluri         | Extracranial-intracranial arterial bypass surgery for occlusive carotid artery disease                         | Stroke                                | 2                   | New review                                 | 2009 (10)                           | 21                                  | 18 (86)                            |
| <b>5</b> | 16625634    | Lasserson     | Fluticasone versus 'extrafine' HFA-beclomethasone dipropionate for chronic asthma in adults and children       | Airways                               | 2                   | New search: no change                      | 2010 (1)                            | 9                                   | 8 (89)                             |
| <b>6</b> | 20166073    | Thomas        | Influenza vaccination for healthcare workers who work with the elderly                                         | Acute Respiratory Infections          | 2                   | New search: conclusions changed            | 2009 (9)                            | 5                                   | 5 (100)                            |
| <b>7</b> | 20166060    | Poole         | Mucolytic agents for chronic bronchitis or chronic obstructive pulmonary disease                               | Airways                               | 2                   | New search: no change                      | 2008 (10)                           | 29                                  | 18 (62)                            |

|           | <b>PMID</b> | <b>Author</b>   | <b>Title</b>                                                                                                                        | <b>Cochrane Group</b>                | <b>Issue (2010)</b> | <b>Review status (as of February 2010)</b> | <b>Year(Month) content update</b> | <b>N studies included in review</b> | <b>N (%) retrievable in Pubmed</b> |
|-----------|-------------|-----------------|-------------------------------------------------------------------------------------------------------------------------------------|--------------------------------------|---------------------|--------------------------------------------|-----------------------------------|-------------------------------------|------------------------------------|
| <b>8</b>  | 20166059    | Jefferson       | Neuraminidase inhibitors for preventing and treating influenza in healthy adults                                                    | Acute Respiratory Infections         | 2                   | New search: conclusions changed            | 2009 (8)                          | 20                                  | 20 (100)                           |
| <b>9</b>  | 20091650    | van den Aardweg | Adenoidectomy for otitis media in children                                                                                          | Ear, Nose and Throat                 | 1                   | New review                                 | 2009 (10)                         | 14                                  | 14 (100)                           |
| <b>10</b> | 20091548    | O'Meara         | Antibiotics and antiseptics for venous leg ulcers                                                                                   | Wounds                               | 1                   | New search: no change                      | 2009 (11)                         | 25                                  | 13 (52)                            |
| <b>11</b> | 20091544    | Abraham         | Antithyroid drug regimen for treating Graves' hyperthyroidism                                                                       | Metabolic and Endocrine Disorders    | 1                   | New search: no change                      | 2009 (4)                          | 27                                  | 23 (85)                            |
| <b>12</b> | 17943870    | Jones           | Artesunate versus quinine for treating severe malaria                                                                               | Infectious Diseases                  | 1                   | New search: no change                      | 2007 (6)                          | 6                                   | 4 (67)                             |
| <b>13</b> | 17443530    | Herkner         | Bed rest for acute uncomplicated myocardial infarction                                                                              | Heart                                | 1                   | New search: no change                      | 2009 (10)                         | 17                                  | 11 (65)                            |
| <b>14</b> | 20091630    | Simon           | Benzodiazepines for the relief of breathlessness in advanced malignant and non-malignant diseases in adults                         | Pain, Palliative and Supportive Care | 1                   | New review                                 | 2009 (9)                          | 7                                   | 4 (57)                             |
| <b>15</b> | 20091622    | Chen            | Blood pressure lowering efficacy of beta-blockers as second-line therapy for primary hypertension                                   | Hypertension                         | 1                   | New review                                 | 2009 (11)                         | 20                                  | 11 (55)                            |
| <b>16</b> | 20091662    | Heran           | Blood pressure lowering efficacy of potassium-sparing diuretics (that block the epithelial sodium channel) for primary hypertension | Hypertension                         | 1                   | New review                                 | 2009 (10)                         | 8                                   | 7 (88)                             |

| PMID | Author   | Title      | Cochrane Group                                                                                                  | Issue (2010)                                    | Review status (as of February 2010) | Year(Month) content update      | N studies included in review | N (%) retrievable in Pubmed |          |
|------|----------|------------|-----------------------------------------------------------------------------------------------------------------|-------------------------------------------------|-------------------------------------|---------------------------------|------------------------------|-----------------------------|----------|
| 17   | 20091514 | Welsh      | Caffeine for asthma                                                                                             | Airways                                         | 1                                   | New search: no change           | 2009 (8)                     | 7                           | 7 (100)  |
| 18   | 20091571 | Misso      | Continuous subcutaneous insulin infusion (CSII) versus multiple insulin injections for type 1 diabetes mellitus | Metabolic and Endocrine                         | 1                                   | New review                      | 2009 (7)                     | 34                          | 27 (79)  |
| 19   | 20091657 | Robert     | Effect of cyclosporine on blood pressure                                                                        | Hypertension                                    | 1                                   | New review                      | 2009 (6)                     | 17                          | 17 (100) |
| 20   | 20091534 | Al-Omran   | Enteral versus parenteral nutrition for acute pancreatitis                                                      | Upper Gastrointestinal and Pancreatic           | 1                                   | New search: conclusions changed | 2009 (10)                    | 8                           | 8 (100)  |
| 21   | 20091596 | Choi       | Exercises for prevention of recurrences of low-back pain                                                        | Back                                            | 1                                   | New review                      | 2009 (7)                     | 13                          | 13 (100) |
| 22   | 20091618 | Taylor Rod | Home-based versus centre-based cardiac rehabilitation                                                           | Heart                                           | 1                                   | New review                      | 2008 (7)                     | 22                          | 17 (77)  |
| 23   | 20091617 | Powell     | Immediate-release versus controlled-release carbamazepine in the treatment of epilepsy                          | Epilepsy                                        | 1                                   | New review                      | 2009 (11)                    | 10                          | 10 (100) |
| 24   | 17054257 | Sreedharan | Proton pump inhibitor treatment initiated prior to endoscopic diagnosis in upper gastrointestinal bleeding      | Upper Gastrointestinal and Pancreatic           | 1                                   | New search: no change           | 2009 (8)                     | 6                           | 3 (50)   |
| 25   | 20091560 | Marshall   | Rectal 5-aminosalicylic acid for induction of remission in ulcerative colitis                                   | Inflammatory Bowel Disease and Functional Bowel | 1                                   | New review                      | 2008 (12)                    | 38                          | 33 (87)  |
| 26   | 18646149 | Cates      | Regular treatment with salmeterol for chronic asthma: serious adverse events                                    | Airways                                         | 1                                   | New search: no change           | 2009 (8)                     | 49                          | 30 (61)  |

| <b>PMID</b>        | <b>Author</b> | <b>Title</b>                                                                                                                                                                        | <b>Cochrane Group</b>                 | <b>Issue (2010)</b> | <b>Review status (as of February 2010)</b> | <b>Year(Month) content up to date</b> | <b>N studies included in review</b> | <b>N (%) retrievable in Pubmed</b> |
|--------------------|---------------|-------------------------------------------------------------------------------------------------------------------------------------------------------------------------------------|---------------------------------------|---------------------|--------------------------------------------|---------------------------------------|-------------------------------------|------------------------------------|
| <b>27</b> 17943842 | Davies        | Rifabutin for treating pulmonary tuberculosis                                                                                                                                       | Infectious Diseases                   | 1                   | New search: no change                      | 2007 (7)                              | 5                                   | 4(80)                              |
| <b>28</b> 20091591 | Billio        | Serotonin receptor antagonists for highly emetogenic chemotherapy in adults                                                                                                         | Pain, Palliative and Supportive Care  | 1                   | New review                                 | 2009 (3)                              | 16                                  | 15(94)                             |
| <b>29</b> 16855986 | van Pinxteren | Short-term treatment with proton pump inhibitors, H2-receptor antagonists and prokinetics for gastro-oesophageal reflux disease-like symptoms and endoscopy negative reflux disease | Upper Gastrointestinal and Pancreatic | 1                   | New search: no change                      | 2009 (10)                             | 45                                  | 38 (80)                            |
| <b>30</b> 20091539 | Rutjes        | Therapeutic ultrasound for osteoarthritis of the knee or hip                                                                                                                        | Musculoskeletal                       | 1                   | New search: conclusions changed            | 2009 (7)                              | 5                                   | 5 (100)                            |
