# Supplementary material for: Sensitivity and Predictive Value of 15 PubMed Search Strategies to Answer Clinical Questions Rated Against Full Systematic Reviews
Source: J Med Internet Res. 2012 Jun 12;14(3):e85. doi: 10.2196/jmir.2021 (PMC3414859; doi:10.2196/jmir.2021)
Supplement: Supplementary file 3 [file jmir_v14i3e85_app3.pdf]

**Multimedia Appendix 3. Detailed search terms for 30 clinical questions, extracted from the abstract of the corresponding Cochrane Systematic Review according to the PICO-framework.**

|          | <b>Population</b>                                                                                             | <b>Intervention</b>                      | <b>Control</b>                           | <b>Outcome</b>                                               |
|----------|---------------------------------------------------------------------------------------------------------------|------------------------------------------|------------------------------------------|--------------------------------------------------------------|
| <b>1</b> | epilepsy OR<br>(partial onset seizures) OR<br>(generalized onset tonic-clonic seizures)                       | carbamazepine monotherapy                | phenytoin monotherapy                    | (withdrawal treatment) OR<br>remission OR<br>seizure         |
| <b>2</b> | pneumonia AND adults                                                                                          | physiotherapy                            |                                          | cure OR<br>mortality OR<br>(adverse events) OR<br>duration   |
| <b>3</b> | (peptic ulcer) AND<br>(bleeding OR haemorrhage)                                                               | epinephrine injection                    | endoscopic treatment                     | rebleeding OR<br>surgery OR<br>complications OR<br>mortality |
| <b>4</b> | carotid AND (occlusion OR symptomatic)                                                                        | extracranial-intracranial bypass surgery |                                          | ischemic OR<br>stroke OR<br>haemodynamic OR<br>dependency    |
| <b>5</b> | asthma                                                                                                        | fluticasone                              | beclomethasone AND<br>(extrafine OR HFA) | (lung function) OR<br>spirometry OR<br>exacerbation          |
| <b>6</b> | ((health care workers) OR<br>(long-term care facilities) OR<br>(nursing homes))<br>AND (elderly OR residents) | influenza vaccination                    |                                          | incidence OR<br>complication OR<br>mortality                 |
| <b>7</b> | (chronic bronchitis) OR COPD                                                                                  | mucolytics                               | placebo                                  | exacerbations                                                |

|    | Population                          | Intervention                                                                          | Control                                        | Outcome                                                                                  |
|----|-------------------------------------|---------------------------------------------------------------------------------------|------------------------------------------------|------------------------------------------------------------------------------------------|
| 8  | influenza AND adults                | (neuraminidase inhibitors) OR<br>oseltamivir OR<br>zanamivir                          | placebo                                        | treatment OR<br>prevention OR<br>transmission OR<br>complications OR<br>(adverse events) |
| 9  | (otitis media) AND children         | adenoidectomy                                                                         |                                                | effusion OR time                                                                         |
| 10 | venous leg ulcer                    | antibiotic OR antiseptic                                                              |                                                | healing OR<br>surface OR<br>size                                                         |
| 11 | Graves' hyperthyroidism             | (antithyroid drug therapy) OR<br>carbimazole OR<br>propylthiouracil OR<br>methimazole | dose OR<br>regimen OR<br>duration              | relapse OR<br>hypothyroidism OR<br>mortality                                             |
| 12 | severe malaria                      | artesunate                                                                            | quinine                                        | mortality                                                                                |
| 13 | uncomplicated myocardial infarction | (bed rest) OR (early mobilisation)                                                    |                                                | mortality OR reinfarction                                                                |
| 14 | advanced OR chronic                 | benzodiazepine                                                                        |                                                | breathlessness OR<br>dyspnoea                                                            |
| 15 | hypertension AND adult              | beta-blocker AND combination                                                          | antihypertensive AND<br>(alone OR monotherapy) | reduction OR<br>(heart rate) OR<br>(adverse effects)                                     |
| 16 | hypertension                        | amiloride OR triamterene                                                              | placebo OR antihypertensive                    | (blood pressure lowering)<br>OR<br>(adverse effects)                                     |
| 17 | asthma AND adults                   | caffeine OR coffee                                                                    | placebo OR decaffeinated                       | (lung function) OR<br>(exhaled nitric oxide)                                             |
| 18 | type 1 diabetes                     | continuous subcutaneous insulin infusion                                              | multiple insulin injection                     | (blood glucose) OR<br>HbA1c OR<br>(hypoglycaemic episodes)<br>OR (quality of life)       |
| 19 |                                     | cyclosporin                                                                           | placebo                                        | blood pressure                                                                           |

|    | Population                                                       | Intervention                                                      | Control                           | Outcome                                                       |
|----|------------------------------------------------------------------|-------------------------------------------------------------------|-----------------------------------|---------------------------------------------------------------|
| 20 | acute pancreatitis                                               | enteral nutrition                                                 | parenteral nutrition              | mortality OR (length of stay) OR SIRS OR MOF OR complications |
| 21 | low-back pain                                                    | exercise OR (physical activity)                                   |                                   | recurrence                                                    |
| 22 | (myocardial infarction) OR (coronary disease) OR (heart failure) | home based rehabilitation                                         | centre OR hospital rehabilitation | mortality OR (quality of life) OR (risk factors)              |
| 23 | epilepsy                                                         | carbamazepine                                                     | controlled release                | seizure OR (adverse events)                                   |
| 24 | upper gastrointestinal bleeding                                  | (proton pump inhibitor) AND (before endoscopy)                    |                                   | mortality OR rebleeding OR surgery                            |
| 25 | ulcerative colitis                                               | 5-ASA AND (rectal OR suppository OR enema)                        |                                   | remission                                                     |
| 26 | asthma                                                           | salmeterol                                                        |                                   | (adverse events) OR mortality                                 |
| 27 | tuberculosis                                                     | rifabutin                                                         | rifampicin                        | culture OR conversion                                         |
| 28 | chemotherapy AND adult AND cancer                                | (serotonin OR 5-HT3) AND antagonists                              |                                   | nausea OR vomiting                                            |
| 29 | (gastro-oesophageal reflux disease) OR heartburn                 | (proton pump inhibitor) OR (H2-receptor antagonist) OR prokinetic |                                   | remission OR relief OR (quality of life)                      |
| 30 | osteoarthritis AND (knee OR hip)                                 | therapeutic ultrasound                                            |                                   | pain OR function                                              |
